# Supplementary material for: Genetic diversity and population structure of a Peruvian cattle herd using SNP data
Source: Frontiers journal article supplement (doi:10.3389/fgene.2023.1073843), 2023-03-10

**Supplementary Figure S1.** Number of populations (K) inferred by 10-fold cross validation. K ranges from 1 to 10.

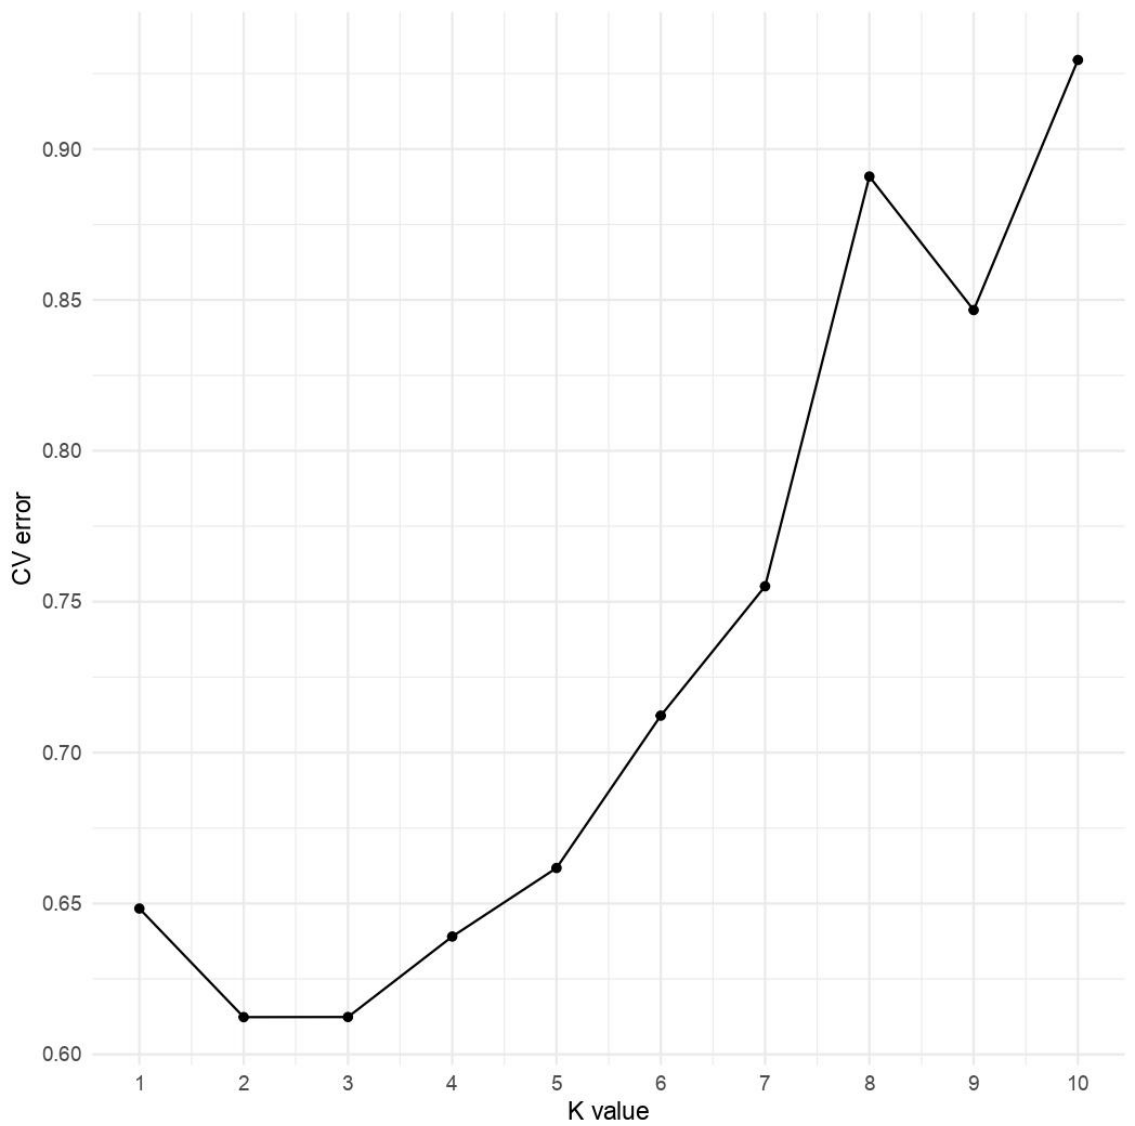

Supplement: Image_1.pdf [file Image_1.pdf]
