# Supplementary material for: Genetic diversity and population structure of a Peruvian cattle herd using SNP data
Source: Front Genet. 2023 Mar 10;14:1073843. doi: 10.3389/fgene.2023.1073843 (PMC10036791; doi:10.3389/fgene.2023.1073843)
Supplement: Supplementary file 1 [file Table1.xlsx]

## Sheet: Sheet1
Supplementary Table S1. Information of the individuals employed in this study.
N	Tag number	Registered number	Sex	Breed	Origin	SNP panel	Cluster
1	5-D	PER-1566	Female	Brahman	Brasil	100K	Cluster 1
2	32-D	PER-1563	Female	Brahman	Brasil	100K	Cluster 1
3	37-D	PER-1561	Female	Brahman	Brasil	100K	Cluster 1
4	74-D	PER-3095	Female	Brahman	Canada and Brasil	100K	Cluster 1
5	102-D	PER-3098	Female	Brahman	Brasil	100K	Cluster 1
6	118-D	3107	Male	Brahman	Brasil	HD	Cluster 1
7	132-D	PER-3101	Female	Brahman	Brasil	100K	Cluster 1
8	161-D	S/R	Female	Brahman	Brasil	100K	Cluster 1
9	168-D	S/R	Female	Brahman	Brasil	100K	Cluster 1
10	29-D	PER03b	Female	Brauvieh	Switzerland and Colombia	100K	Cluster2
11	36-D	PER04b	Female	Brauvieh	Switzerland and Colombia	100K	Cluster2
12	48-D	PER-05b	Female	Brauvieh	Switzerland and Colombia	100K	Cluster2
13	56-D	PER09b	Female	Brauvieh	Switzerland and Colombia	100K	Cluster2
14	58-D	PER10b	Female	Brauvieh	NI	100K	Cluster2
15	75-D	PER11	Female	Brauvieh	Switzerland and Colombia	100K	Cluster2
16	89-D	PER14	Male	Brauvieh	Switzerland and Colombia	HD	Cluster2
17	153-D	S/R	Female	Brauvieh	NI	100K	Cluster2
18	156-D	S/R	Female	Brauvieh	NI	100K	Cluster2
19	4-D	PER323	Female	Gyr	Brasil	100K	Cluster 1
20	53-D	PER345	Female	Gyr	Brasil	100K	Cluster 1
21	73-D	PER230	Male	Gyr	Brasil	HD	Cluster 1
22	83-D	PER231	Male	Gyr	Brasil	HD	Cluster 1
23	90-D	PER669	Female	Gyr	Brasil	100K	Cluster 1
24	TP-001A	TP-001A	Male	AFB	Peru	100K	Cluster2
25	TP-006B	TP-006B	Male	AFB	Peru	100K	Cluster2
26	TP-007B	TP-007B	Male	AFB	Peru	100K	Cluster2
27	TP-010A	TP-010A	Male	AFB	Peru	100K	Cluster2
28	TP-019A	TP-019A	Male	AFB	Peru	100K	Cluster2
29	TP-027A	TP-027A	Male	AFB	Peru	100K	Cluster2
30	VP-003A	VP-003A	Male	AFB	Peru	100K	Cluster2
31	VP-013A	VP-013A	Male	AFB	Peru	100K	Cluster2
32	VP-016D	VP-016D	Male	AFB	Peru	100K	Cluster2
33	13-D	PER131	Female	Fleckvieh	Germany and New Zealand	100K	Cluster2
34	14-D	PER132	Female	Fleckvieh	NI	100K	Cluster2
35	25-D	PER134	Female	Fleckvieh	Germany, Austria and Colombia	100K	Cluster2
36	28-D	PER135	Female	Fleckvieh	Germany	100K	Cluster2
37	30-D	PER136	Female	Fleckvieh	NI	100K	Cluster2
38	66-D	PER1081	Female	Fleckvieh	Germany and Colombia	100K	Cluster2
39	87-D	PER1085	Female	Fleckvieh	Germany, Austria, New Zealand and Colombia	100K	Cluster2
40	88-D	PER1086	Female	Fleckvieh	Germany and Colombia	100K	Cluster2
41	99-D	PER1087	Female	Fleckvieh	Germany, Austria and Colombia	100K	Cluster2
42	106-D	PER916	Male	Fleckvieh	NI	HD	Cluster2
43	114-D	PER1090	Female	Fleckvieh	NI	100K	Cluster2
44	131-D	PER1093	Female	Fleckvieh	NI	100K	Cluster2
45	138-D	PER1095	Female	Fleckvieh	NI	100K	Cluster2
46	163-D	S/R	Female	Fleckvieh	NI	100K	Cluster2
47	164-D	S/R	Male	Fleckvieh	NI	HD	Cluster2
AFB: Arequipa Fighting Bull
NI: not identified
